# Supplementary material for: A perylene bisimide derivative with pyrene and cholesterol as modifying structures: synthesis and fluorescence behavior
Source: Royal Society of Chemistry journal article supplement (doi:10.1039/c6cp01447j), 2016-01-01
Supplement: c6cp01447j1.pdf [file c6cp01447j1.pdf]

## Electronic Supplementary Information

*for*

### A Perylene Bisimide Derivative with Pyrene and Cholesterol as Modifying Structures: Synthesis and Fluorescence Behavior

Gang Wang,<sup>a</sup> Weina Wang,<sup>a</sup> Rong Miao,<sup>a</sup> Congdi Shang,<sup>a</sup> Meixia He,<sup>a</sup> Haonan Peng,<sup>a</sup>  
Gang He,<sup>b</sup> and Yu Fang<sup>a,\*</sup>

<sup>a</sup>Key Laboratory of Applied Surface and Colloid Chemistry (Ministry of Education), School of Chemistry and Chemical Engineering, Shaanxi Normal University, Xi'an 710062, P. R. China

<sup>b</sup>Frontier Institute of Science and Technology, Xi'an Jiaotong University, Xi'an 710049, P. R. China

Corresponding authors: yfang@snnu.edu.cn

#### Contents

|                                                                                              |    |
|----------------------------------------------------------------------------------------------|----|
| 1. Synthesis strategy of the compounds.....                                                  | S3 |
| 2. Synthesis and characterization.....                                                       | S3 |
| 3. <sup>1</sup> H- <sup>1</sup> H NOESY spectroscopy of C-PBI-Py in CDCl <sub>3</sub> .....  | S5 |
| 4. <sup>1</sup> H- <sup>1</sup> H COSY spectroscopy of C-PBI-Py in CDCl <sub>3</sub> .....   | S5 |
| 5. Cyclic voltammograms of C-Py, C-PBI and C-PBI-Py in CH <sub>2</sub> Cl <sub>2</sub> ..... | S6 |
| 6. UV-Vis absorption spectra of C-PBI, C-Py and their mixture.....                           | S6 |
| 7. Fluorescence emission spectra of C-Py, C-PBI and their mixture.....                       | S7 |
| 8. Normalized fluorescence excitation and emission spectra of C-PBI-Py.....                  | S7 |

|                                                                                                                                                 |     |
|-------------------------------------------------------------------------------------------------------------------------------------------------|-----|
| 9. Fluorescence emission spectra of C-PBI in different solvents.....                                                                            | S8  |
| 10. Concentration-dependent fluorescence emission spectra of C-PBI-Py in chloroform                                                             | S8  |
| 11. Lifetime of C-PBI-Py in chloroform.....                                                                                                     | S9  |
| 12. Lifetime of C-PBI in chloroform.....                                                                                                        | S9  |
| 13. Summary of the fluorescence quantum yields of C-PBI-Py and C-PBI in chloroform<br>.....                                                     | S10 |
| 14. Concentration-dependent UV-Vis absorption spectra of C-PBI-Py in chloroform..                                                               | S10 |
| 15. UV-Vis absorption spectra of C-PBI-Py in the mixture solvent.....                                                                           | S11 |
| 16. Concentration-dependent $^1\text{H}$ NMR spectra of C-PBI-Py.....                                                                           | S11 |
| 17. Time-resolved emission spectra of C-PBI-Py in chloroform at a concentration of<br>$1.0 \times 10^{-4}$ mol/L.....                           | S12 |
| 18. Time-resolved emission spectra of PBI-Py in chloroform at a concentration of $5.0 \times 10^{-6}$<br>mol/L.....                             | S12 |
| 19. Fluorescence emission spectra of C-PBI in chloroform at a concentration of $5.0 \times 10^{-6}$<br>mol/L at two different temperatures..... | S13 |
| 20. Temperature-dependent fluorescence emission spectra of C-PBI-Py in chloroform at<br>$2.0 \times 10^{-5}$ mol/L.....                         | S13 |
| 21. Temperature-dependent UV-Vis absorption spectra of C-PBI-Py in chloroform.....                                                              | S14 |
| 22. Lifetimes recorded at 535 nm of C-PBI-Py in chloroform at different temperatures                                                            | S14 |
| 23. Lifetimes recorded at 630 nm of C-PBI-Py in chloroform at different temperatures                                                            | S15 |
| 24. $^1\text{H}$ NMR spectra of the target and the reference compounds.....                                                                     | S16 |

## 1. Synthesis strategy of the compounds

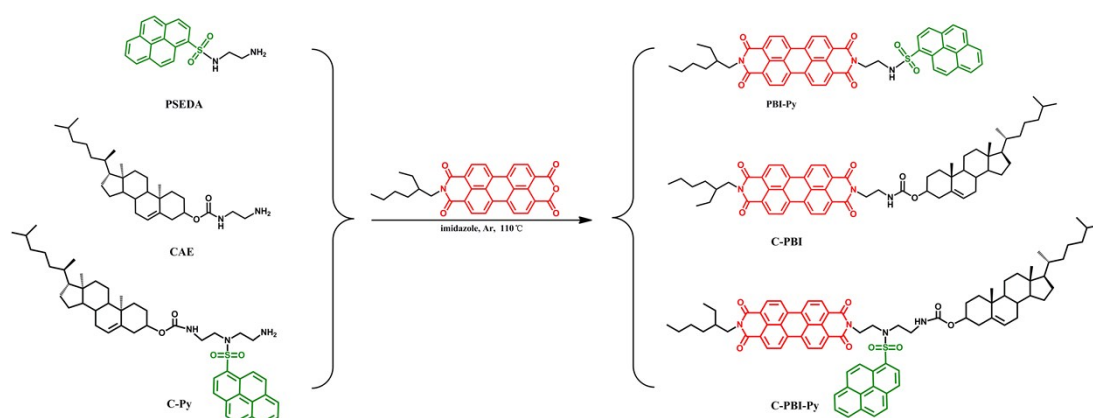

**Scheme S1.** The synthesis strategy of C-PBI-Py, PBI-Py and C-PBI

## 2. Synthesis and characterization

### Preparation of C-PBI-Py

EHPMI (0.036 g, 0.072 mmol), C-Py (0.071 g, 0.091 mmol) and imidazole (2.00 g) were heated under argon atmosphere at 110 °C for 4 h, and then cooled to room temperature. The reaction mixture was dispersed in 50 mL ethanol and stirred rapidly for 2 h at room temperature. The resulting suspension was filtrated and washed with ethanol to give a red solid. Subsequently, the mixture as obtained was purified by column chromatography on silica gel column with  $\text{CH}_2\text{Cl}_2/\text{CH}_3\text{OH}$  (v/v, 20:1) to yield a deep red solid product.  $^1\text{H}$  NMR ( $\text{CDCl}_3/\text{Me}_4\text{Si}$ , 600 MHz, Fig. S21),  $\delta$  (ppm): 8.75 (d,  $J=8.4$ , 2H, perylene), 8.61 (d,  $J=7.8$ , 1H, pyrene), 8.38-8.42 (m, 3H, perylene & pyrene), 7.90-7.94 (m, 3H, perylene & pyrene), 7.85 (d,  $J=7.8$ , 2H, perylene), 7.74-7.77 (m, 2H, pyrene), 7.57 (d,  $J=9.0$ , 1H, pyrene), 7.35 (d,  $J=8.4$ , 1H, pyrene), 7.18 (t,  $J=7.2$ , 1H, pyrene), 7.05 (d,  $J=7.2$ , 1H, pyrene), 5.42 (s, 1H,  $H\text{-C}=\text{C}$ ), 5.29 (t,  $J=6.6$ , 1H, NH), 4.61 (m, 1H, OCH), 4.18-4.27 (m, 6H,  $\text{CH}_2\text{NS}$  &  $\text{CHCH}_2\text{N}$ ), 3.92 (s, 2H,  $\text{CH}_2\text{CH}_2\text{NH}$ ), 3.75 (m, 2H,  $\text{CH}_2\text{CH}_2\text{NS}$ ), 0.68-2.47 (m, 58H, cholesteryl protons &  $\text{CH}_3(\text{CH}_2)_3\text{CHCH}_2\text{CH}_3$ ); IR (KBr),  $\nu_{\text{max}}$  ( $\text{cm}^{-1}$ ): 3387 (NH), 2930 ( $\text{CH}_2$ ), 1695 ( $\text{O}=\text{C}-\text{O}$ ), 1659 ( $\text{O}=\text{C}-\text{N}$ ), 1595 ( $\text{C}=\text{C}$ ), 1157 ( $\text{S}=\text{O}$ ); MS ( $m/z$ ), Calcd for  $[(\text{M}+\text{Na})^+]$ : 1287.62, found: 1287.51.

### Preparation of PBI-Py

A similar procedure was employed for synthesis of PBI-Py by using PSEDA instead of EHPMI.  $^1\text{H}$  NMR ( $(\text{CD}_3)_2\text{SO}/\text{Me}_4\text{Si}$ , 600 MHz, Fig. S22),  $\delta$  (ppm): 8.43 (d,  $J=9.0$ , 1H, pyrene), 8.29-8.34 (m, 3H, perylene & pyrene), 8.22 (d,  $J=7.8$ , 2H, perylene), 7.92 (d,  $J=7.8$ , 1H, pyrene), 7.84 (d,  $J=9.0$ , 1H, pyrene), 7.79 (d,  $J=7.8$ , 1H, pyrene), 7.69 (d,  $J=7.2$ , 2H, perylene), 7.35-7.39 (m, 4H, perylene & pyrene), 7.10-7.12 (m, 2H, pyrene), 3.97-4.05 (m, 2H,  $\text{CHCH}_2\text{N}$ ), 3.92 (s, 2H,  $\text{CH}_2\text{NH}$ ), 3.52 (s, 2H,  $\text{CH}_2\text{CH}_2\text{NH}$ ), 1.92 (m, 1H,  $\text{CHCH}_2\text{N}$ ), 1.33-1.43 (m, 8H,  $(\text{CH}_2)_3\text{CHCH}_2$ ), 0.90-0.96 (m, 6H,  $\text{CH}_2\text{CH}_3$ ); IR (KBr),  $\nu_{\text{max}}$  ( $\text{cm}^{-1}$ ): 3296 (NH), 3040 (ArH), 2926 ( $\text{CH}_2$ ), 1693 (O=C-O), 1655 (O=C-N), 1593 (C=C); MS (m/z), Calcd for  $[(\text{M} + \text{Na})^+]$ : 832.25, found: 832.27.

### Preparation of C-PBI

A similar procedure was adopted for synthesis of C-PBI by using CAE instead of EHPMI.  $^1\text{H}$  NMR ( $\text{CDCl}_3/\text{Me}_4\text{Si}$ , 600 MHz, Fig. S23),  $\delta$  (ppm): 8.54-8.66 (m, 8H, perylene), 5.12 (t,  $J=5.4$ , 1H,  $\text{H-C=C}$ ), 5.07 (s, 1H, NH), 4.41 (m, 2H,  $\text{CH}_2\text{CH}_2\text{NH}$ ), 4.30 (m, 1H, OCH), 4.11-4.20 (m, 2H,  $\text{CHCH}_2\text{N}$ ), 3.59 (s, 2H,  $\text{CH}_2\text{CH}_2\text{NH}$ ), 0.62-2.07 (m, 58H, cholesteryl protons &  $\text{CH}_3$   $(\text{CH}_2)_3\text{CHCH}_2\text{CH}_3$ ); IR (KBr),  $\nu_{\text{max}}$  ( $\text{cm}^{-1}$ ): 3371 (NH), 2934 ( $\text{CH}_2$ ), 1697 (O=C-O), 1657 (O=C-N), 1595 (C=C); MS (m/z), Calcd for  $[(\text{M} + \text{Na})^+]$ : 957.57, found: 957.72.

### 3. $^1\text{H}$ - $^1\text{H}$ NOESY spectroscopy of C-PBI-Py in $\text{CDCl}_3$

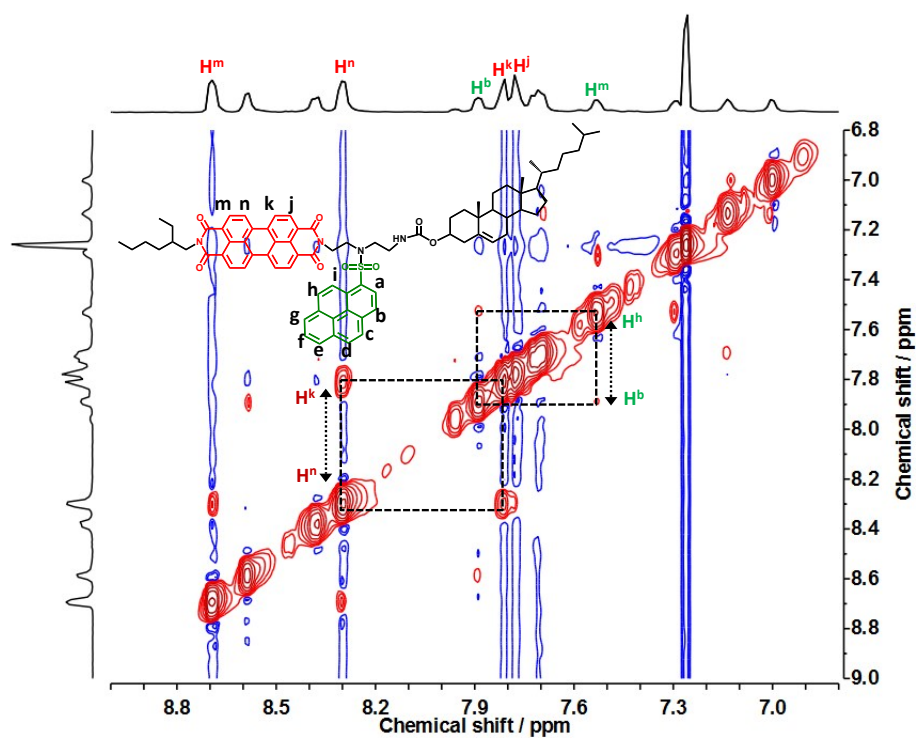

Fig. S1  $^1\text{H}$ - $^1\text{H}$  NOESY spectroscopy of C-PBI-Py in  $\text{CDCl}_3$ .

### 4. $^1\text{H}$ - $^1\text{H}$ COSY spectroscopy of C-PBI-Py in $\text{CDCl}_3$

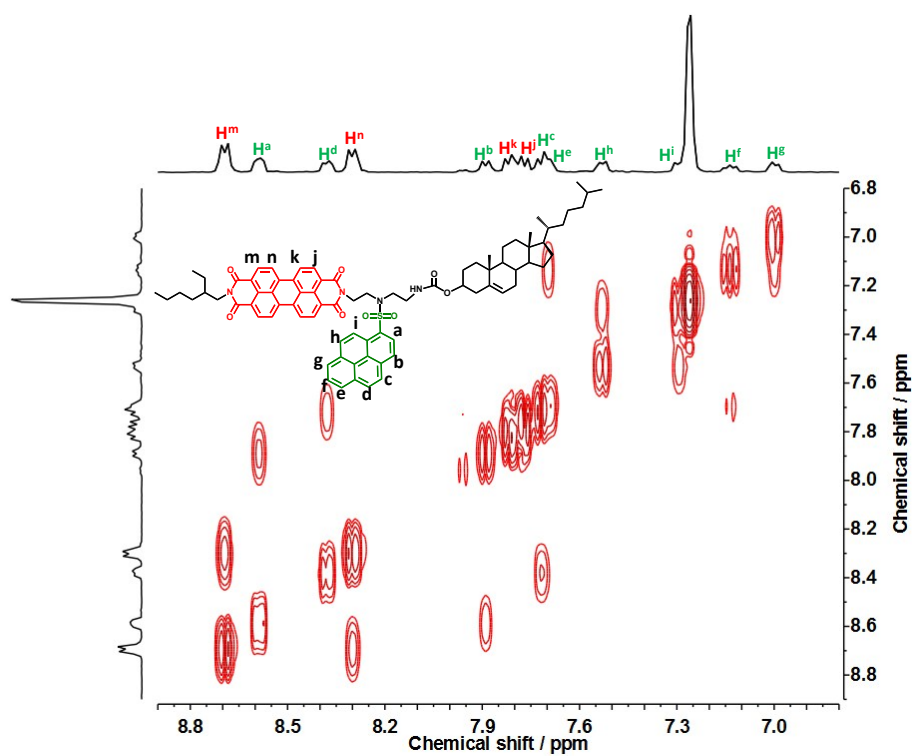

Fig. S2  $^1\text{H}$ - $^1\text{H}$  COSY spectroscopy of C-PBI-Py in  $\text{CDCl}_3$ .

## 5. Cyclic voltammograms of C-Py, C-PBI and C-PBI-Py in CH<sub>2</sub>Cl<sub>2</sub>

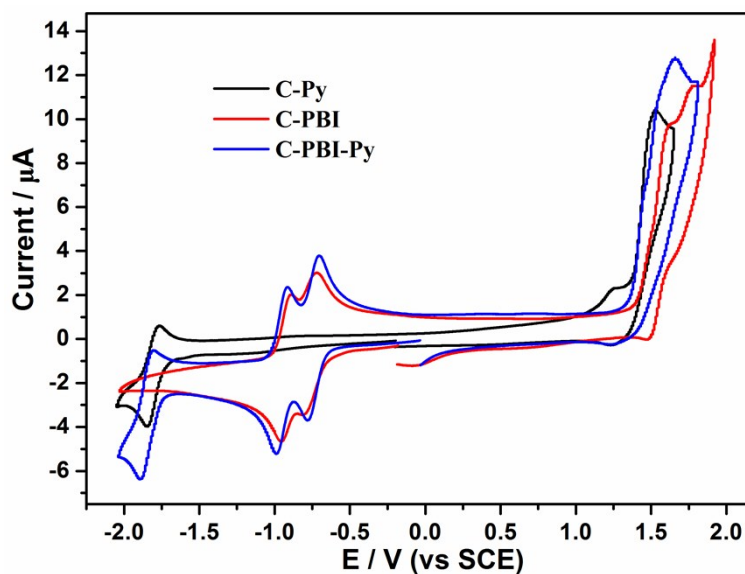

**Fig. S3** CV traces of C-Py (black solid), C-PBI (red solid) and C-PBI-Py (blue solid) in dichloromethane at a concentration of  $5.0 \times 10^{-4}$  mol/L with  $2.0 \times 10^{-4}$  mol/L tetrabutylammonium hexafluorophosphate as supporting electrolyte, the scan rate was  $100 \text{ mVs}^{-1}$ .

## 6. UV-Vis absorption spectra of C-PBI, C-Py and their mixture

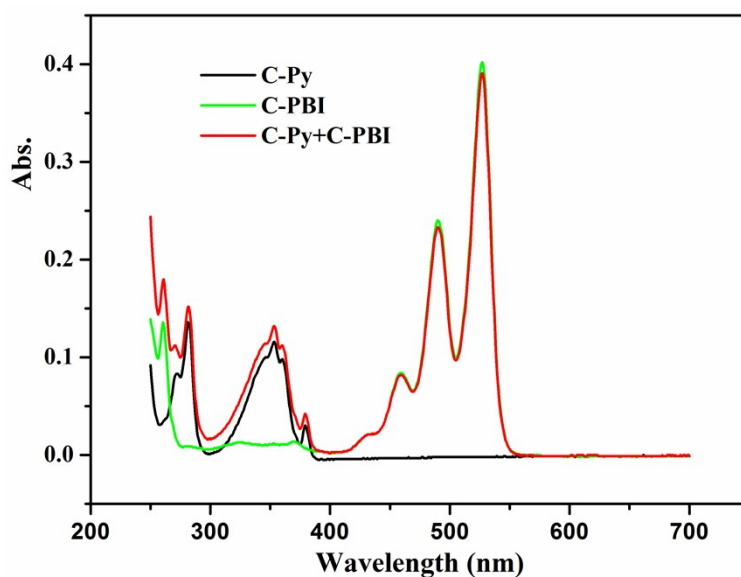

**Fig. S4** UV-Vis absorption spectra of C-Py (black solid), C-PBI (green solid) and their mixture (red solid) in chloroform at a concentration of  $5.0 \times 10^{-6}$  mol/L.

## 7. Fluorescence emission spectra of C-Py, C-PBI and their mixture

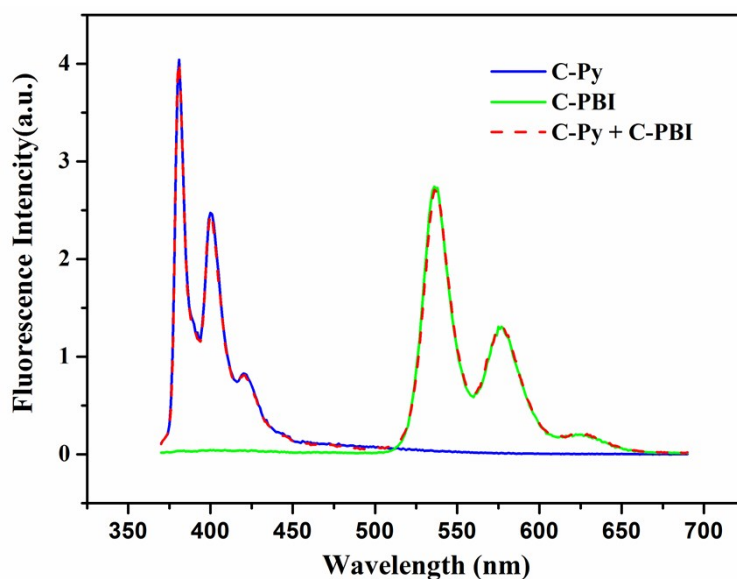

**Fig. S5** Fluorescence emission spectra of C-Py (blue solid), C-PBI (green solid) and their mixture (red dash) in chloroform at a concentration of  $5.0 \times 10^{-6}$  mol/L upon the excitation at 353 nm.

## 8. Normalized fluorescence excitation and emission spectra of C-PBI-Py

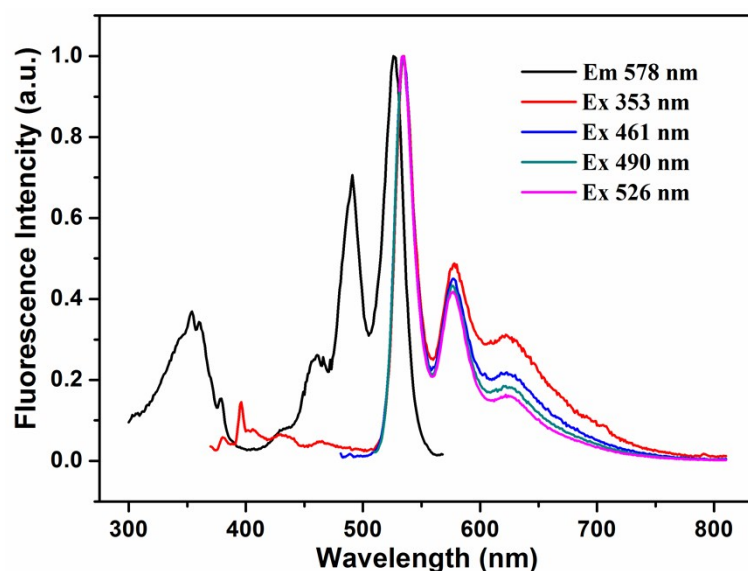

**Fig. S6** Normalized fluorescence excitation and emission spectra of C-PBI-Py in chloroform at a concentration of  $2.0 \times 10^{-7}$  mol/L. The monitoring wavelength is 578 nm, and the excitation wavelengths are 353, 461, 490 and 526 nm, respectively.

## 9. Fluorescence emission spectra of C-PBI in different solvents

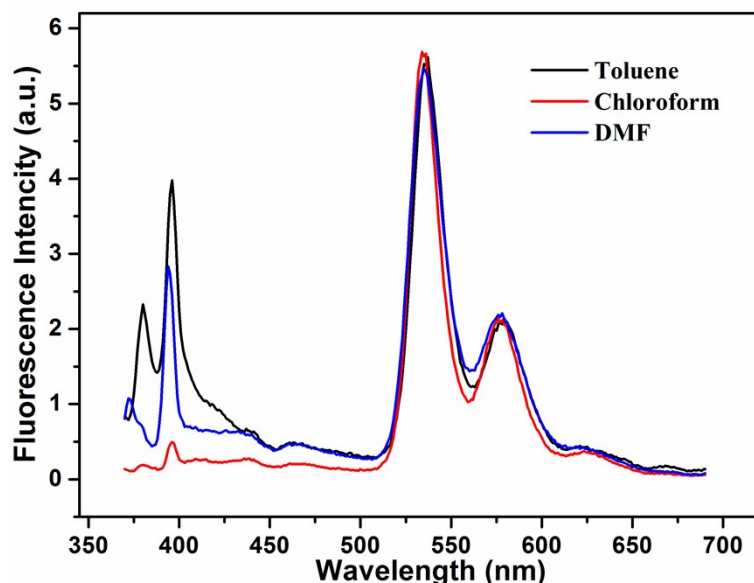

**Fig. S7** Fluorescence emission spectra of C-PBI in toluene (black solid), chloroform (red solid) and DMF (blue solid) at a concentration of  $5.0 \times 10^{-8}$  mol/L upon the excitation at 353 nm.

## 10. Concentration-dependent fluorescence emission spectra of C-PBI-Py in chloroform

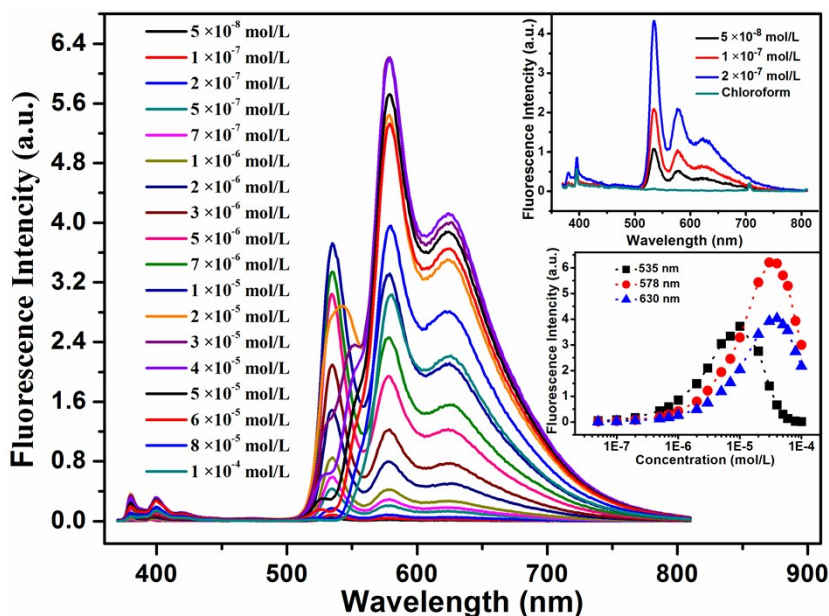

**Fig. S8** Concentration-dependent fluorescence emission spectra of C-PBI-Py in chloroform in the concentration range from  $5.0 \times 10^{-8}$  mol/L to  $1.0 \times 10^{-4}$  mol/L, of which the adopted excitation wavelength is 353 nm. Inset: Fluorescence emission spectra of C-PBI-Py in chloroform at concentrations between  $5.0 \times 10^{-8}$  mol/L and  $2.0 \times 10^{-7}$  mol/L, and the excitation wavelength is 353 nm (left top), Plot of the fluorescence intensity at 535 nm, 578 nm, 630 nm, respectively, against the concentration of C-PBI-Py in chloroform (left bottom).



## 11. Lifetime of C-PBI-Py in chloroform

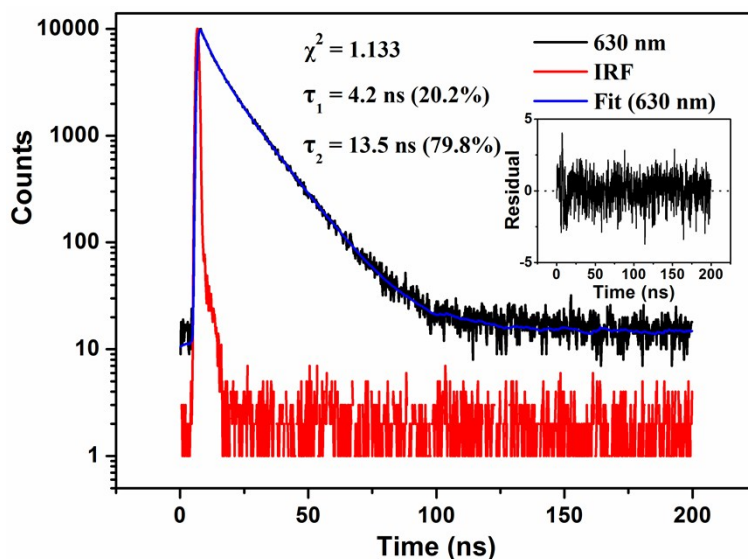

**Fig. S9** Lifetime at 630 nm of C-PBI-Py in chloroform at a concentration of  $5.0 \times 10^{-6}$  mol/L using picosecond pulsed diode laser (EPLED-340) as an excitation source. The red trace is the instrumental response function (IRF). The inset is the corresponding residual-distribution. Note: Chi-square ( $\chi^2$ ) is a parameter to quantify the fitting quality.

## 12. Lifetime of C-PBI in chloroform

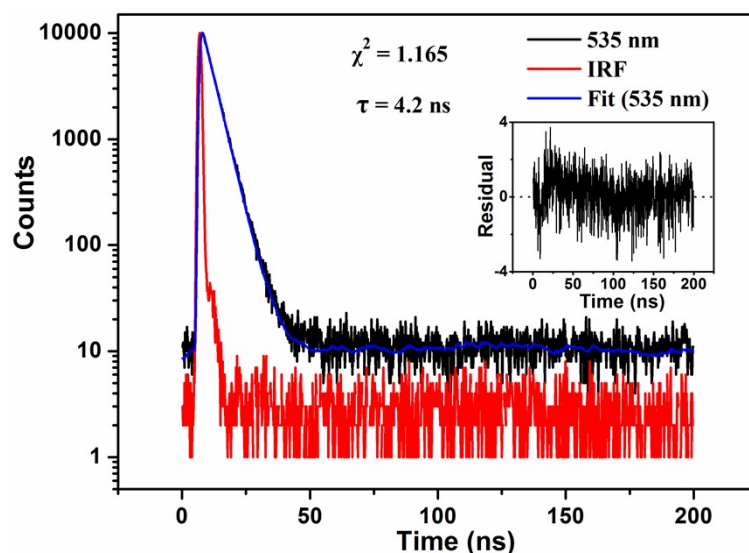

**Fig. S10** Lifetime at 535 nm of C-PBI in chloroform at a concentration of  $5.0 \times 10^{-6}$  mol/L using picosecond pulsed diode laser (EPLED-340) as an excitation source. The red trace is the instrumental response function (IRF). The inset is the corresponding residual-distribution. Note: Chi-square ( $\chi^2$ ) is a parameter to quantify the fitting quality.

### 13. Summary of the fluorescence quantum yields of C-PBI-Py and C-PBI in chloroform

Table S1. Summary of the fluorescence quantum yields of C-PBI-Py and C-PBI in chloroform

| Compound                    | C-PBI-Py ( $\Phi_{pe}$ ) <sup>a</sup> | C-PBI <sup>b</sup> |
|-----------------------------|---------------------------------------|--------------------|
| Fluorescence quantum yields | 13.2%                                 | 97.3%              |

Note: <sup>a</sup>  $\Phi_{pe}$  represents the fluorescence quantum yield of the PBI unit of C-PBI-Py, of which the integral range of the emission spectrum of C-PBI-Py is from 505 to 690 nm and the excitation wavelength is 353 nm. <sup>b</sup> The integral range for this compound is from 505 to 700 nm, and the excitation wavelength is 490 nm.

### 14. Concentration-dependent UV-Vis absorption spectra of C-PBI-Py in chloroform

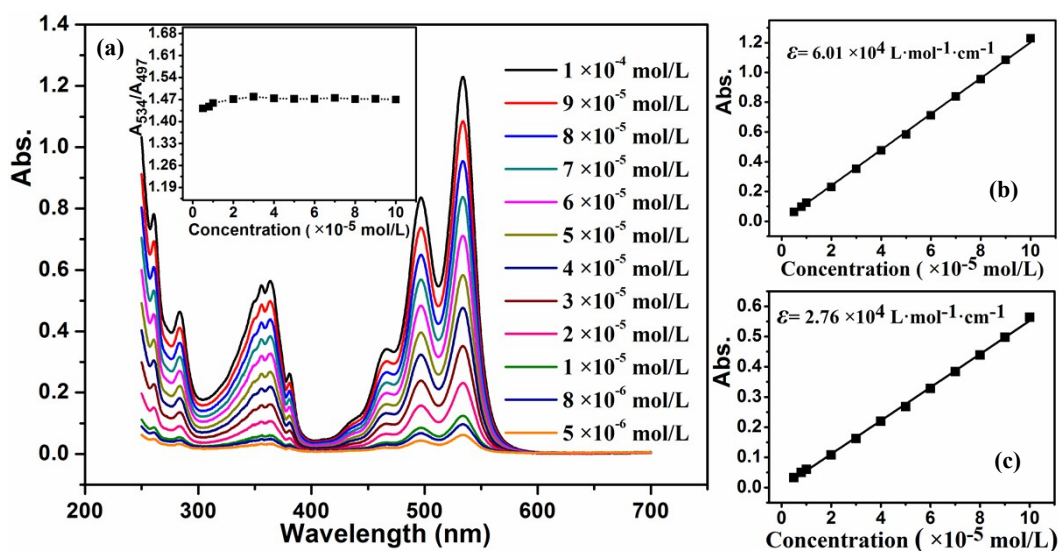

Fig. S11 Concentration-dependent UV-Vis absorption spectra of C-PBI-Py in chloroform ranging from  $5.0 \times 10^{-6}$  mol/L to  $1.0 \times 10^{-4}$  mol/L, the inset is a plot of  $A_{534}/A_{497}$  of C-PBI-Py in chloroform as a function of concentration (a); Plot of the absorbance of the C-PBI-Py solution in chloroform as a function of concentration, recorded at 534 nm (b) and 364 nm (c), respectively.

## 15. UV-Vis absorption spectra of C-PBI-Py in chloroform and the mixture solvent

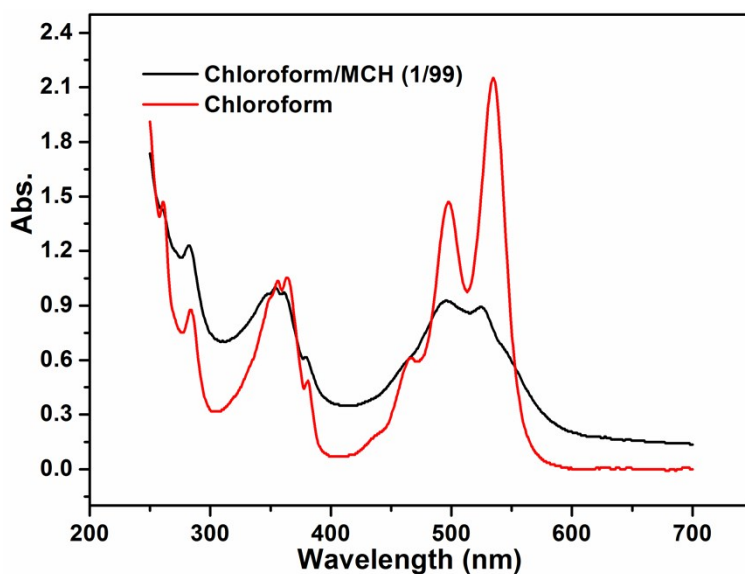

**Fig. S12** UV-Vis absorption spectra of C-PBI-Py in chloroform and the mixture solvent (chloroform / Methylcyclohexane, v/v, 1/99) normalized at 354 nm at a concentration of  $5.0 \times 10^{-6}$  mol/L.

## 16. Concentration-dependent $^1\text{H}$ NMR spectra of C-PBI-Py

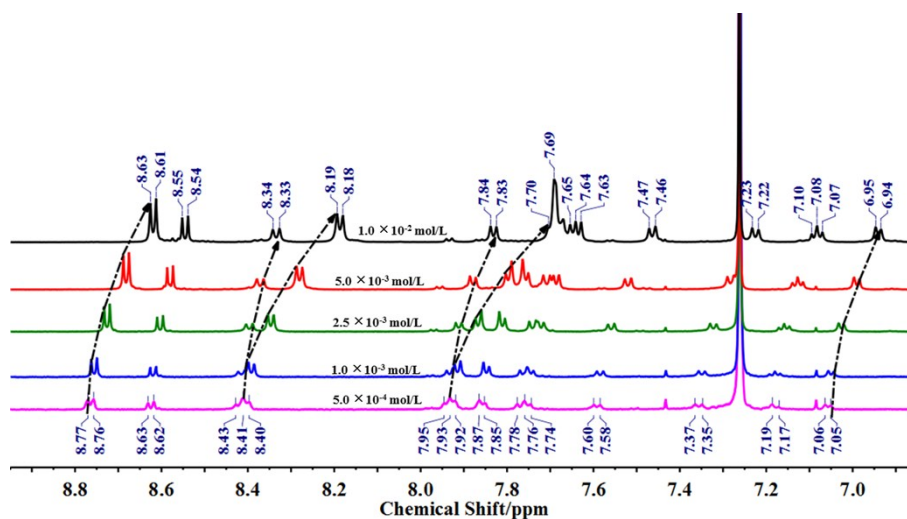

**Fig. S13** Concentration-dependent partial  $^1\text{H}$  NMR spectra of C-PBI-Py in deuterated chloroform ranging from  $5.0 \times 10^{-4}$  mol/L to  $1.0 \times 10^{-2}$  mol/L.

**17. Time-resolved emission spectra of C-PBI-Py in chloroform at a concentration of  $1.0 \times 10^{-4}$  mol/L**

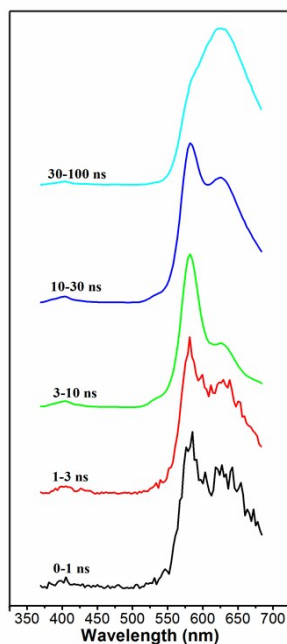

**Fig. S14** Time-resolved emission spectra of C-PBI-Py in chloroform at a concentration of  $1.0 \times 10^{-4}$  mol/L using picosecond pulsed diode laser (EPLD-340) as an excitation source.

**18. Time-resolved emission spectra of PBI-Py in chloroform at a concentration of  $5.0 \times 10^{-6}$  mol/L**

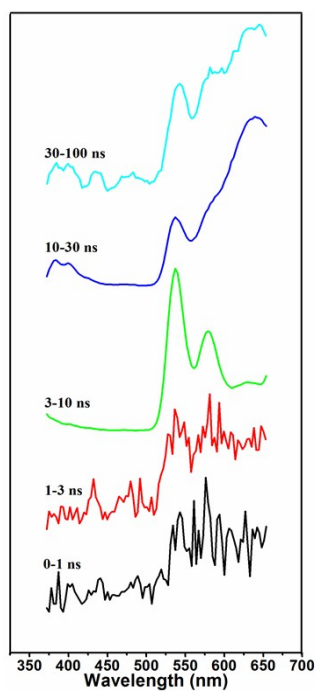

**Fig. S15** Time-resolved emission spectra of PBI-Py in chloroform at a concentration of  $5.0 \times 10^{-6}$  mol/L using picosecond pulsed diode laser (EPLD-340) as an excitation source.

**19. Fluorescence emission spectra of C-PBI in chloroform at a concentration of  $5.0 \times 10^{-6}$  mol/L at two different temperatures**

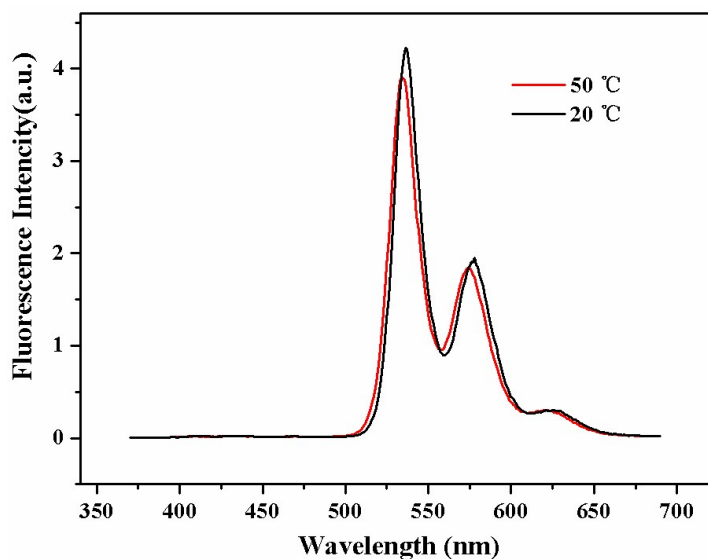

**Fig. S16** Fluorescence emission spectra of C-PBI in chloroform at a concentration of  $5.0 \times 10^{-6}$  mol/L at two different temperatures.

**20. Temperature-dependent fluorescence emission spectra of C-PBI-Py in chloroform at  $2.0 \times 10^{-5}$  mol/L**

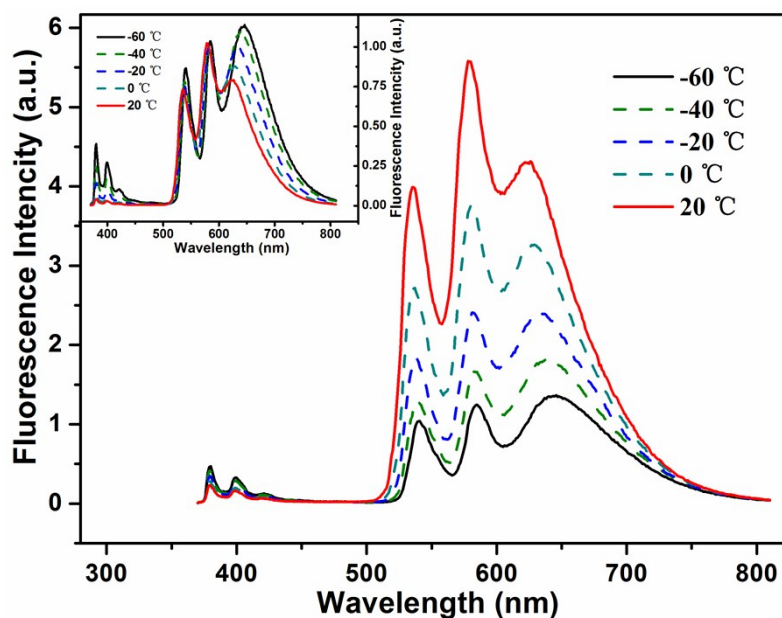

**Fig. S17** Temperature-dependent fluorescence emission spectra of C-PBI-Py solution in chloroform ( $2.0 \times 10^{-5}$  mol/L) ranging from 20 °C to -60 °C, of which the excitation wavelength is 353 nm. The inset is the emission spectra normalized at 582 nm.

## 21. Temperature-dependent UV-Vis absorption spectra of C-PBI-Py in chloroform

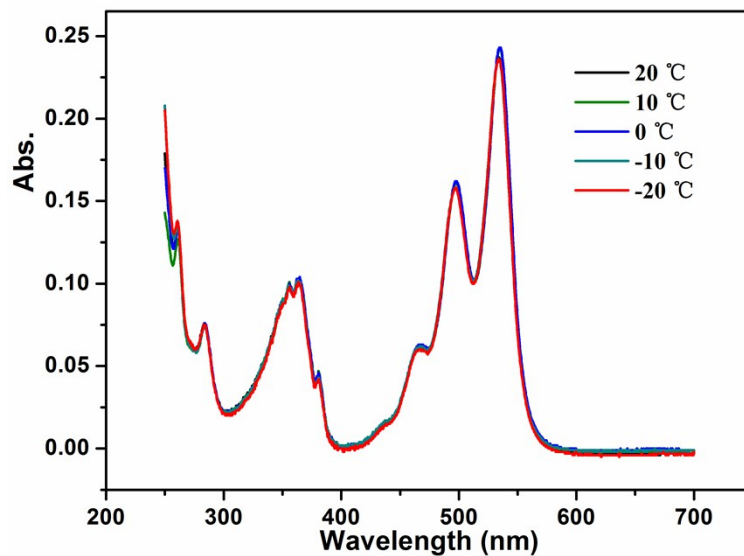

**Fig. S18** Temperature-dependent UV-Vis absorption spectra of C-PBI-Py in chloroform at  $5.0 \times 10^{-6}$  mol/L monitored from 20 °C to -20 °C.

## 22. Lifetimes recorded at 535 nm of C-PBI-Py in chloroform at different temperatures

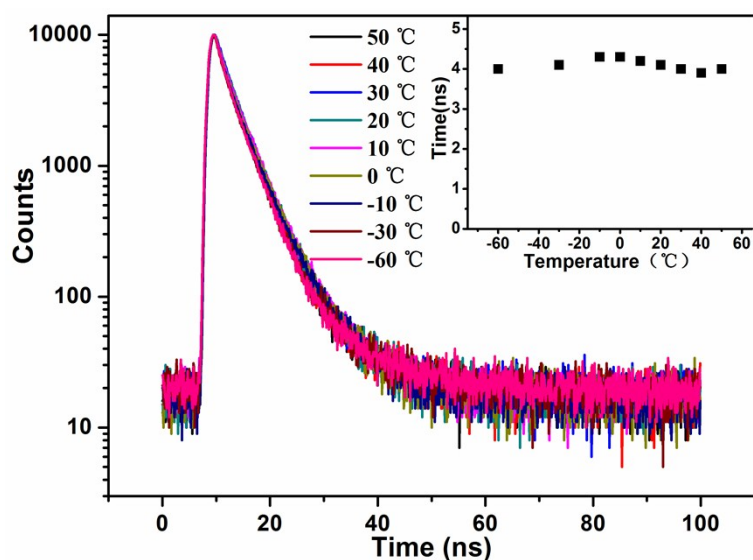

**Fig. S19** Lifetimes at 535 nm of C-PBI-Py in chloroform at a concentration of  $5.0 \times 10^{-6}$  mol/L at different temperatures using picosecond pulsed diode laser (EPLD-340) as an excitation source. The inset is the plot of the average lifetime at 535 nm of C-PBI-Py against the temperature.

### 23. Lifetimes recorded at 630 nm of C-PBI-Py in chloroform at different temperatures

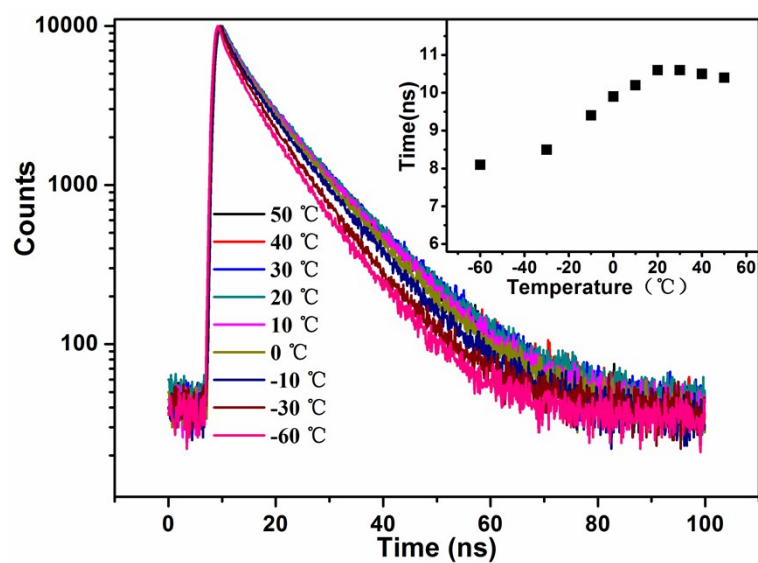

**Fig. S20** Lifetimes at 630 nm of C-PBI-Py in chloroform at a concentration of  $5.0 \times 10^{-6}$  mol/L at different temperatures using picosecond pulsed diode laser (EPLD-340) as an excitation source. The inset is the plot of the average lifetime at 630 nm of C-PBI-Py against the temperature.

## 24. <sup>1</sup>H NMR spectra of the target and the reference compounds

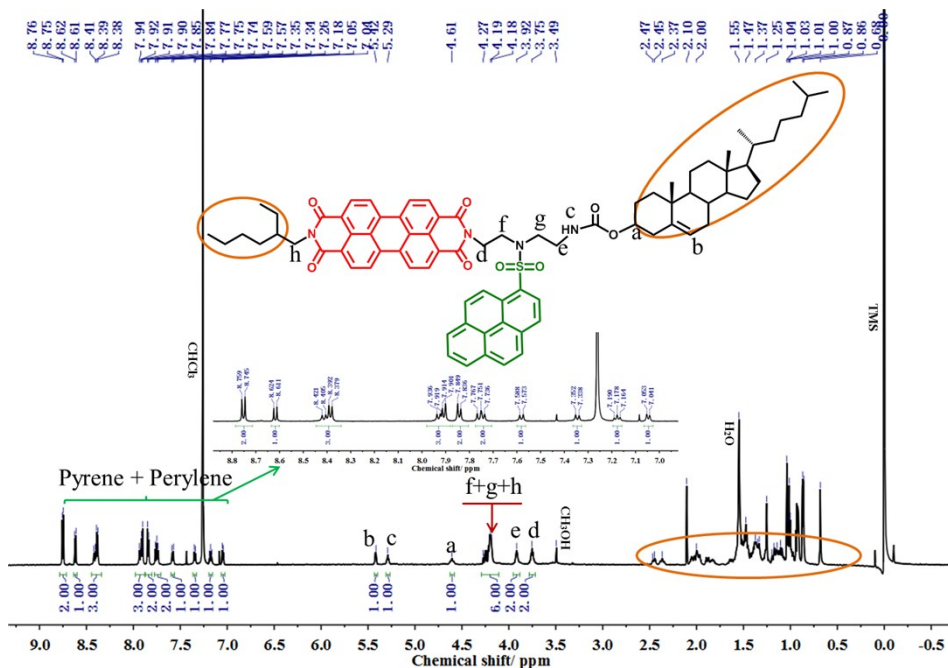

Fig. S21 <sup>1</sup>H NMR spectrum of C-PBI-Py in CDCl<sub>3</sub>.

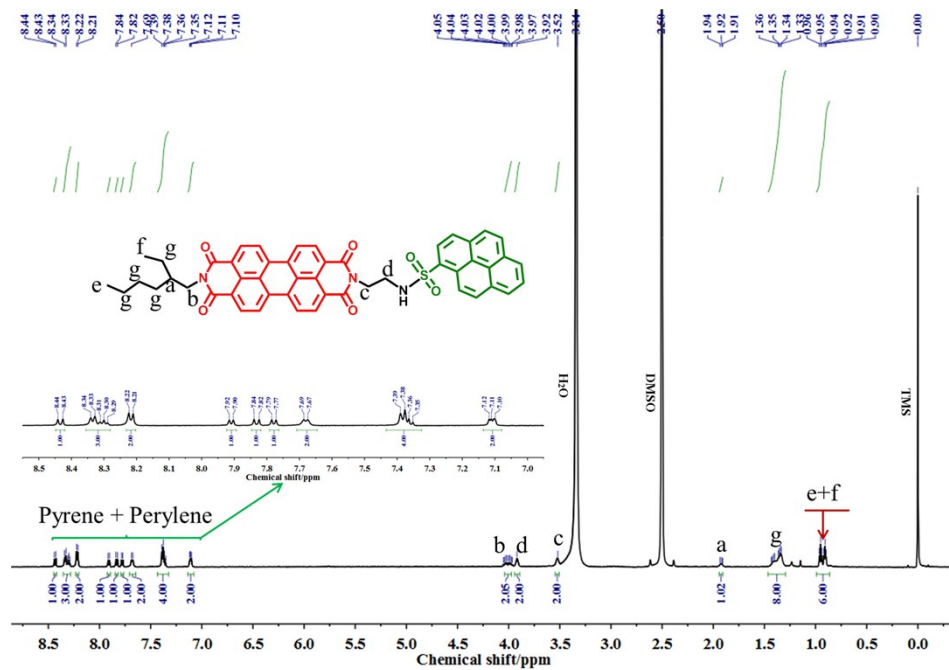

Fig. S22 <sup>1</sup>H NMR spectrum of PBI-Py in CDCl<sub>3</sub>.



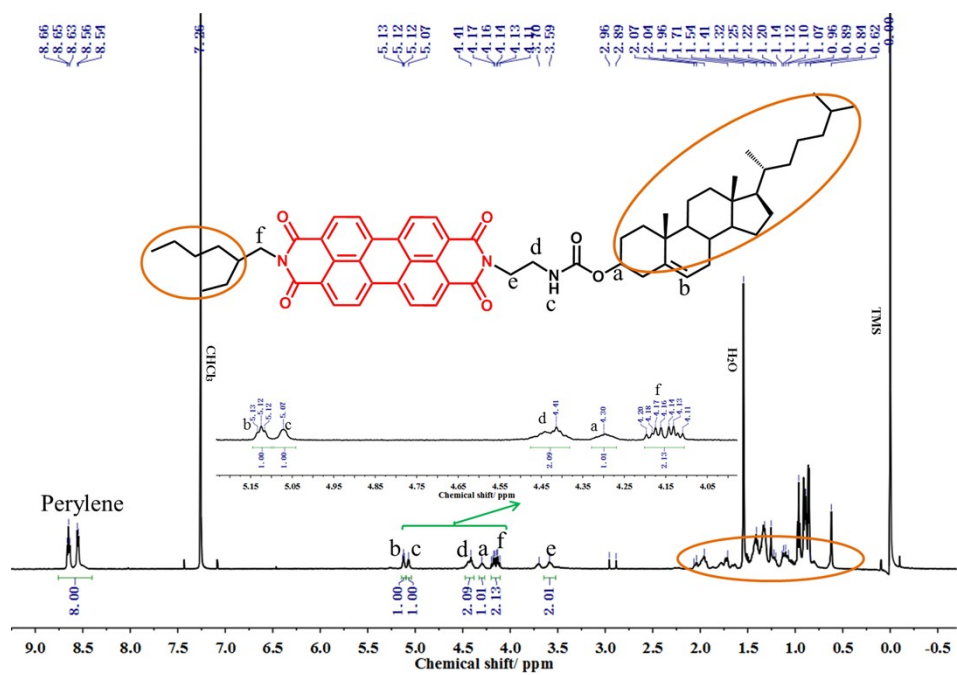

**Fig. S23**  $^1\text{H}$  NMR spectrum of C-PBI in  $\text{CDCl}_3$ .
